# Supplementary material
Source: Springer Nature journal article supplement (https://www.springermedizin.de/resource/supplementary/12889_2013_5445_MOESM4_ESM.pdf/9495372)
Supplement: MOESM4 [file 9495372]

Baseline assessments

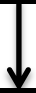

Block randomisation  
of teams

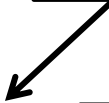

Intervention: Mums  
Step it Up Program

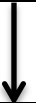

Intervention:  
pedometer with  
log book

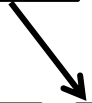

Control group:  
written information

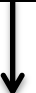

6 week assessment

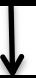

6 month assessment
